# Supplementary material for: Altered Reward Processing in Women Recovered From Anorexia Nervosa
Source: Atypon-hosted journal article supplement (doi:10.1176/appi.ajp.2007.07040575), 2007-12-01
Supplement: ajp_164_12_1842_01.pdf [file ajp_164_12_1842_01.pdf]

**TABLE A. Regions of Significant Activation in Within-Groups Comparisons of Outcome (Win or Loss)<sup>a</sup>**

| Region                                         | Talairach Coordinates | Cluster Size | F      | p       |
|------------------------------------------------|-----------------------|--------------|--------|---------|
| <b>Control women</b>                           |                       |              |        |         |
| Bilateral posterior cingulate, BA31            | -5, -55, 24           | 143          | 8.503  | <0.0001 |
| Right precentral, BA4                          | 57, -13, 27           | 19           | 5.413  | 0.0001  |
| Left posterior cingulate, BA29                 | -9, -41, 14           | 8            | 4.819  | 0.0001  |
| Left superior temporal, BA22                   | -53, -4, -3           | 18           | 5.414  | 0.0001  |
| Right hippocampal region                       | 26, -26, -9           | 9            | 5.683  | <0.0001 |
| Bilateral ventral striatum                     | 5, 13, -4             | 21           | 5.764  | <0.0001 |
| <b>Recovered women</b>                         |                       |              |        |         |
| Left precentral, BA6                           | -25, -14, 52          | 30           | 7.665  | <0.0001 |
| Left inferior parietal, BA40                   | -41, -51, 45          | 146          | 11.392 | <0.0001 |
| Bilateral precuneus, BA7                       | -2, -67, 42           | 12           | 5.314  | 0.0001  |
| Left cingulate, BA31                           | -11, -39, 38          | 26           | 5.98   | <0.0001 |
| Right supramarginal, BA40                      | 44, -51, 37           | 14           | 6.439  | <0.0001 |
| Right cingulate, BA31                          | 2, -32, 34            | 10           | 4.618  | 0.005   |
| Right precuneus, BA31                          | 13, -60, 30           | 11           | 9.068  | <0.0001 |
| Right cingulate, BA23                          | 2, -15, 29            | 19           | 6.155  | <0.0001 |
| Left posterior cingulate, BA 29                | -8, -42, 21           | 21           | 7.181  | <0.0001 |
| Left thalamus                                  | -1, -20, 13           | 97           | 4.84   | 0.0003  |
| Bilateral dorsal striatum and anterior putamen | 15, 14, 5             | 534          | 7.01   | <0.0001 |
| Left pulvinar                                  | -21, -24, 15          | 10           | 13.766 | <0.0001 |
| Left anterior cingulate, BA24                  | -1, 31, 15            | 18           | 5.113  | 0.0002  |
| Let inferior frontal, BA46                     | -37, 32, 13           | 13           | 7.337  | <0.0001 |
| Right posterior putamen                        | 29, -13, 6            | 16           | 4.798  | 0.0004  |
| Left fusiform, BA37                            | -45, -47, -10         | 21           | 4.787  | 0.0004  |
| Right tuber, cerebellum                        | 48, -52, -24          | 25           | 5.681  | <0.0001 |
| Right declive, cerebellum                      | 3, -79, -21           | 18           | 8.373  | <0.0001 |
| Right rostral pons, brainstem                  | 6, -8, -22            | 9            | 6.802  | <0.0001 |

<sup>a</sup> Table shows all regions that reached significance with a voxelwise significance of  $F < 3.421$ ,  $df = 6, 72$ ,  $p < 0.005$ , and a cluster size of at least eight contiguous significant voxels.

**TABLE B. Regions of Significant Activation in a Comparison of Group by Outcome by Time<sup>a</sup>**

| Region                                  | Talairach Coordinates | Cluster Size | F     | p       |
|-----------------------------------------|-----------------------|--------------|-------|---------|
| Left inferior parietal, BA40            | -41, -52, 45          | 8            | 3.893 | 0.0012  |
| Left precuneus, BA7                     | -19, -77, 41          | 13           | 4.427 | 0.0004  |
| Bilateral posterior cingulate, BA31     | -3, -57, 25           | 129          | 6.059 | <0.0001 |
| Right cuneus, BA18                      | 6, -83, 19            | 20           | 4.625 | 0.0003  |
| Right middle frontal, BA4               | 44, 20, 33            | 13           | 3.776 | 0.0016  |
| Right precentral, BA4                   | 58, -11, 31           | 9            | 4.126 | 0.0007  |
| Left corpus callosum                    | -3, 2, 24             | 14           | 4.378 | 0.0004  |
| Right posterior cingulate, BA23/31      | 14, -55, 21           | 8            | 3.609 | 0.0023  |
| Left, between claustrum and putamen     | -30, -4, 10           | 8            | 3.516 | 0.0028  |
| Right thalamus, ventral lateral nucleus | 10, -10, 5            | 10           | 3.999 | 0.001   |
| Left inferior temporal gyrus, BA37      | -43, -51, -6          | 16           | 4.431 | 0.0004  |
| Right inferior frontal, BA47            | 50, 21, -4            | 10           | 4.425 | 0.0004  |
| Right hippocampal region                | 27, -27, -9           | 16           | 5.562 | <0.0001 |
| Bilateral rostral pons, brainstem       | 1, -11, -18           | 15           | 4.291 | 0.0005  |
| Right tuber, cerebellum                 | 42, -67, -26          | 12           | 5.286 | <0.0001 |

<sup>a</sup> Table shows all regions that reached significance with a voxelwise significance of  $F < 2.93$ ,  $df = 6, 144$ ,  $p < 0.01$ , and a cluster size of at least eight contiguous significant voxels.

**TABLE C. Regions of Significant Activation in a Comparison of Group by Time, Collapsed Across Outcome<sup>a</sup>**

| Region                              | Talairach Coordinates | Cluster Size | F     | p       |
|-------------------------------------|-----------------------|--------------|-------|---------|
| Left inferior parietal, BA40        | -59, -28, 36          | 19           | 5.163 | 0.0002  |
| Right postcentral, BA2              | 59, -15, 23           | 41           | 6.385 | <0.0001 |
| Right superior temporal gyrus, BA22 | 57, -38, 17           | 19           | 6.405 | <0.0001 |
| Right posterior cingulate, BA29     | 9, -37, 15            | 10           | 4.265 | 0.001   |
| Right anterior striatum             | 17, 15, -5            | 80           | 7.712 | <0.0001 |
| Right superior temporal gyrus, BA22 | 46, -31, 4            | 14           | 4.942 | 0.0003  |
| Right lingual gyrus, BA19           | 21, -51, 0            | 8            | 4.414 | 0.0007  |
| Left superior frontal gyrus, BA10   | -22, 55, 2            | 23           | 4.056 | 0.0015  |
| Right lingual gyrus, BA17           | 14, -93, -11          | 19           | 5.583 | <0.0001 |
| Right insula, BA38                  | 45, 3, -6             | 10           | 4.559 | 0.0006  |
| Left substantia nigra               | -11, -24, -10         | 10           | 4.331 | 0.0009  |
| Left hippocampal region             | -10, -9, -13          | 28           | 6.437 | <0.0001 |
| Right anterior cingulate, BA32      | 19, 40, -6            | 8            | 4.801 | 0.0004  |
| Right inferior frontal, BA47        | 22, 28, -7            | 12           | 4.861 | 0.0003  |
| Right hippocampal region            | 20, -17, -19          | 24           | 6.492 | <0.0001 |
| Left cerebellum                     | -34, -50, -21         | 8            | 3.947 | 0.0018  |

<sup>a</sup> Table shows all regions that reached significance with a voxelwise significance of  $F < 3.421$ ,  $df = 6, 72$ ,  $p < 0.005$ , and a cluster size of at least eight contiguous significant voxels.
